# Supplementary material
Source: PubMed Central journal article supplement (PMC6556720)
Supplement: CJN.13391118SupplementaryData.pdf [file CJN.13391118SupplementaryData.pdf]

## **Supplemental Material**

**Supplemental Table 1.** Numbers of participants according to changes in eGFR and UACR.

**Supplemental Figure 1.** Study design and identification of the study cohort.

**Supplemental Figure 2.** Diagram showing the grouping of participants according to a combination of change in albuminuria category and percent change in UACR.

**Supplemental Figure 3.** Diagram showing the grouping of participants according to baseline and change in A) eGFR and B) UACR to account for regression to the mean, using a 40% cut-off for the changes in eGFR and UACR.

**Supplemental Figure 4.** Diagram showing the grouping of participants according to baseline and change in A) eGFR and B) UACR to account for regression to the mean, using a 10% cut-off for the changes in eGFR and UACR.

**Supplemental Figure 5.** Sensitivity analysis; Adjusted associations of 2-year changes in eGFR or UACR with the risk of subsequent major clinical outcomes, after exclusion of randomized BP and glucose control treatments and change in systolic BP were excluded from covariates, or additional adjustment for change in HbA<sub>1c</sub>.

**Supplemental Figure 6.** Sensitivity analysis; Adjusted associations of 2-year changes in UACR with the risk of subsequent major clinical outcomes, using different definitions.

**Supplemental Figure 7.** Sensitivity analysis; Adjusted associations of 2-year changes in eGFR or UACR with the risk of subsequent major clinical outcomes, using a 30% cut-off for the changes in eGFR and UACR.

**Supplemental Figure 8.** Sensitivity analysis; Adjusted associations of 2-year changes in eGFR or UACR with the risk of subsequent major clinical outcomes, after adjusting for regression to the mean, using a 40% cut-off for the changes in eGFR and UACR.

**Supplemental Figure 9.** Sensitivity analysis; Adjusted associations of 2-year changes in eGFR or UACR with the risk of subsequent major clinical outcomes, after adjusting for regression to the mean, using a 10% cut-off for the changes in eGFR and UACR.

**Supplemental Figure 10.** Sensitivity analysis; Adjusted associations of combination of 2-year changes in eGFR and UACR with the risk of subsequent major clinical outcomes, using a 30% cut-off for the changes in eGFR and UACR.

**Supplemental Figure 11.** Sensitivity analysis; Adjusted associations of combination of 2-year changes in eGFR and UACR with the risk of subsequent major clinical outcomes, after adjusting for regression to the mean, using a 40% cut-off for the changes in eGFR and UACR.

**Supplemental Table 1. Numbers of participants according to changes in eGFR and UACR**

**A)**

|                       | Change in eGFR        |                          |                       | Total                   |
|-----------------------|-----------------------|--------------------------|-----------------------|-------------------------|
|                       | Increased $\geq 40\%$ | Minor change             | Decreased $\geq 40\%$ |                         |
| Change in UACR        |                       |                          |                       |                         |
| Decreased $\geq 40\%$ | 91 (1)<br>[23 (1)]    | 2352 (27)<br>[591 (27)]  | 72 (1)<br>[23 (1)]    | 2515 (29)<br>[637 (29)] |
| Minor change          | 101 (1)<br>[26 (1)]   | 2805 (32)<br>[634 (29)]  | 96 (1)<br>[28 (1)]    | 3002 (34)<br>[688 (31)] |
| Increased $\geq 40\%$ | 112 (1)<br>[24 (1)]   | 3029 (35)<br>[801 (37)]  | 108 (1)<br>[41 (2)]   | 3249 (37)<br>[866 (40)] |
| Total                 | 304 (3)<br>[73 (3)]   | 8186 (93)<br>[2026 (92)] | 276 (3)<br>[92 (4)]   |                         |

Number in parentheses represents %.

Number in brackets represents number of events.

**B)**

|                       | Change in eGFR        |                          |                       | Total                   |
|-----------------------|-----------------------|--------------------------|-----------------------|-------------------------|
|                       | Increased $\geq 30\%$ | Minor change             | Decreased $\geq 30\%$ |                         |
| Change in UACR        |                       |                          |                       |                         |
| Decreased $\geq 30\%$ | 198 (2)<br>[43 (2)]   | 2539 (29)<br>[614 (28)]  | 224 (3)<br>[76 (3)]   | 2961 (34)<br>[733 (33)] |
| Minor change          | 141 (2)<br>[34 (2)]   | 1968 (22)<br>[453 (21)]  | 188 (2)<br>[50 (2)]   | 2297 (26)<br>[537 (25)] |
| Increased $\geq 30\%$ | 238 (3)<br>[55 (3)]   | 2982 (34)<br>[765 (35)]  | 288 (3)<br>[101 (5)]  | 3508 (40)<br>[921 (42)] |
| Total                 | 577 (8)<br>[132 (6)]  | 7489 (85)<br>[1832 (84)] | 700 (7)<br>[227 (10)] |                         |

Number in parentheses represents %.

Number in brackets represents number of events.

Supplemental Figure 1

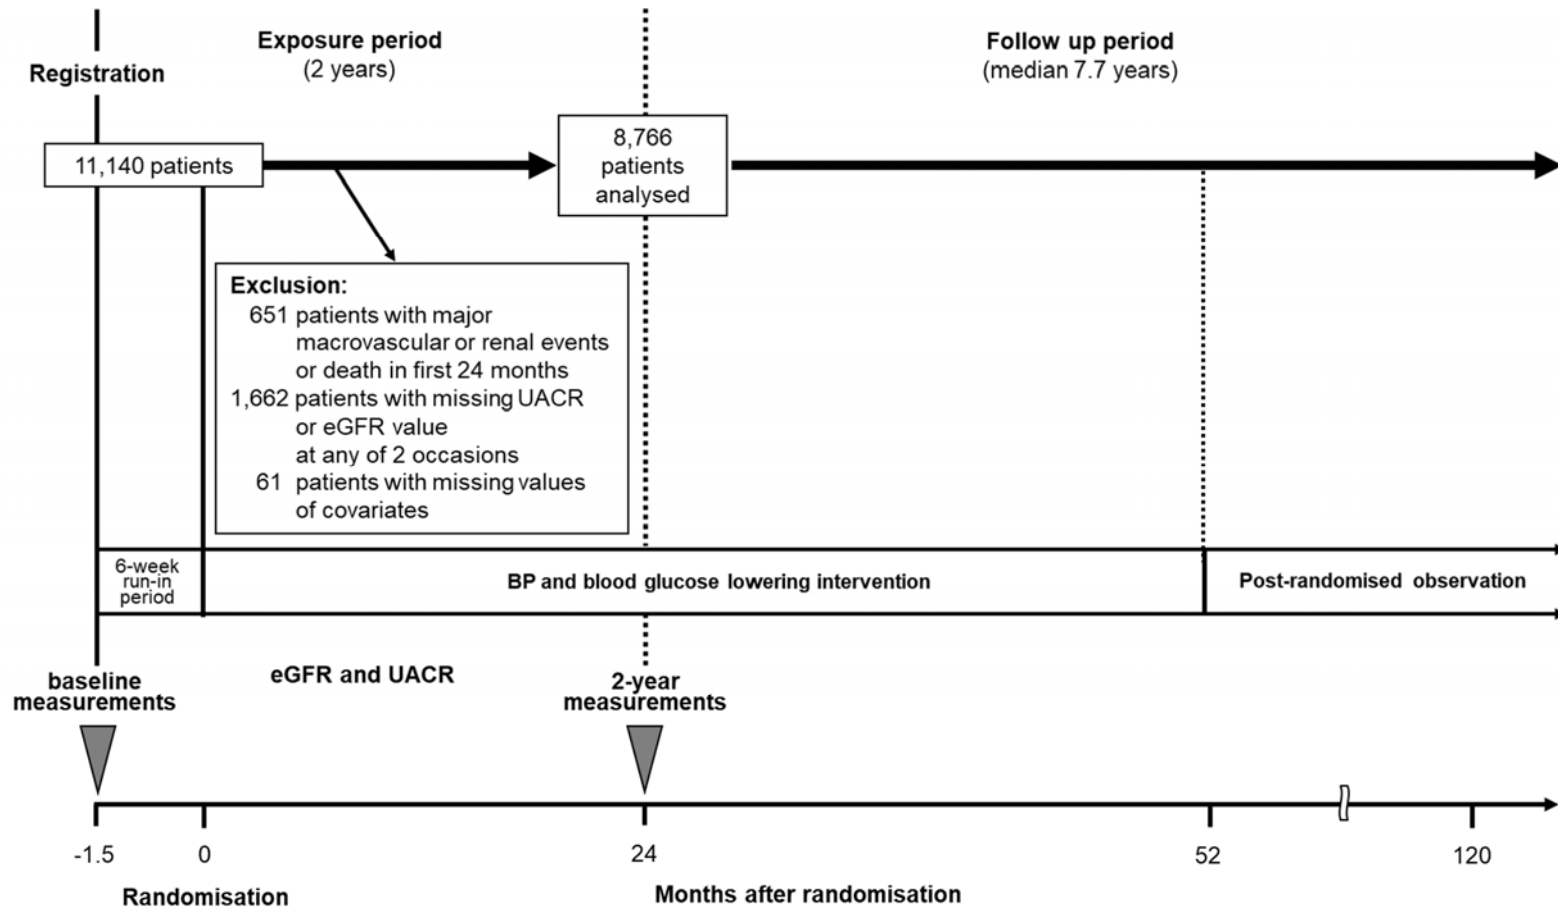

Supplemental Figure 2

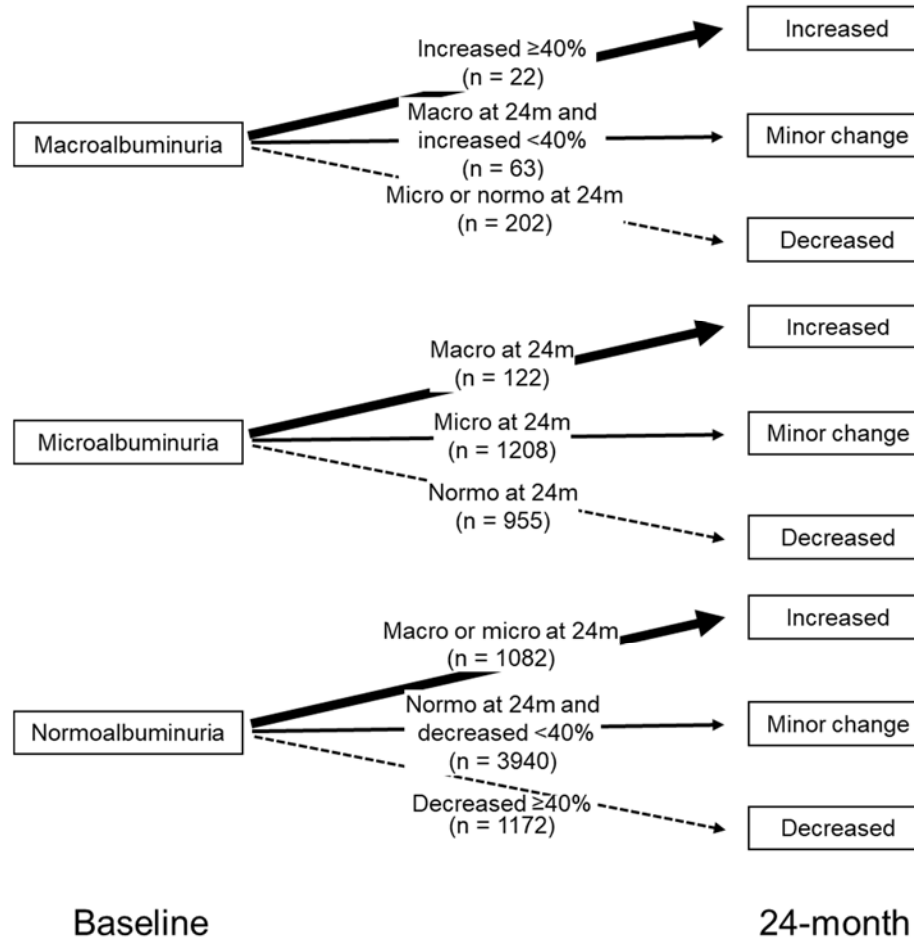

Supplemental material is neither peer-reviewed nor thoroughly edited by CJASN. The authors alone are responsible for the accuracy and presentation of the material.

Supplemental Figure 3

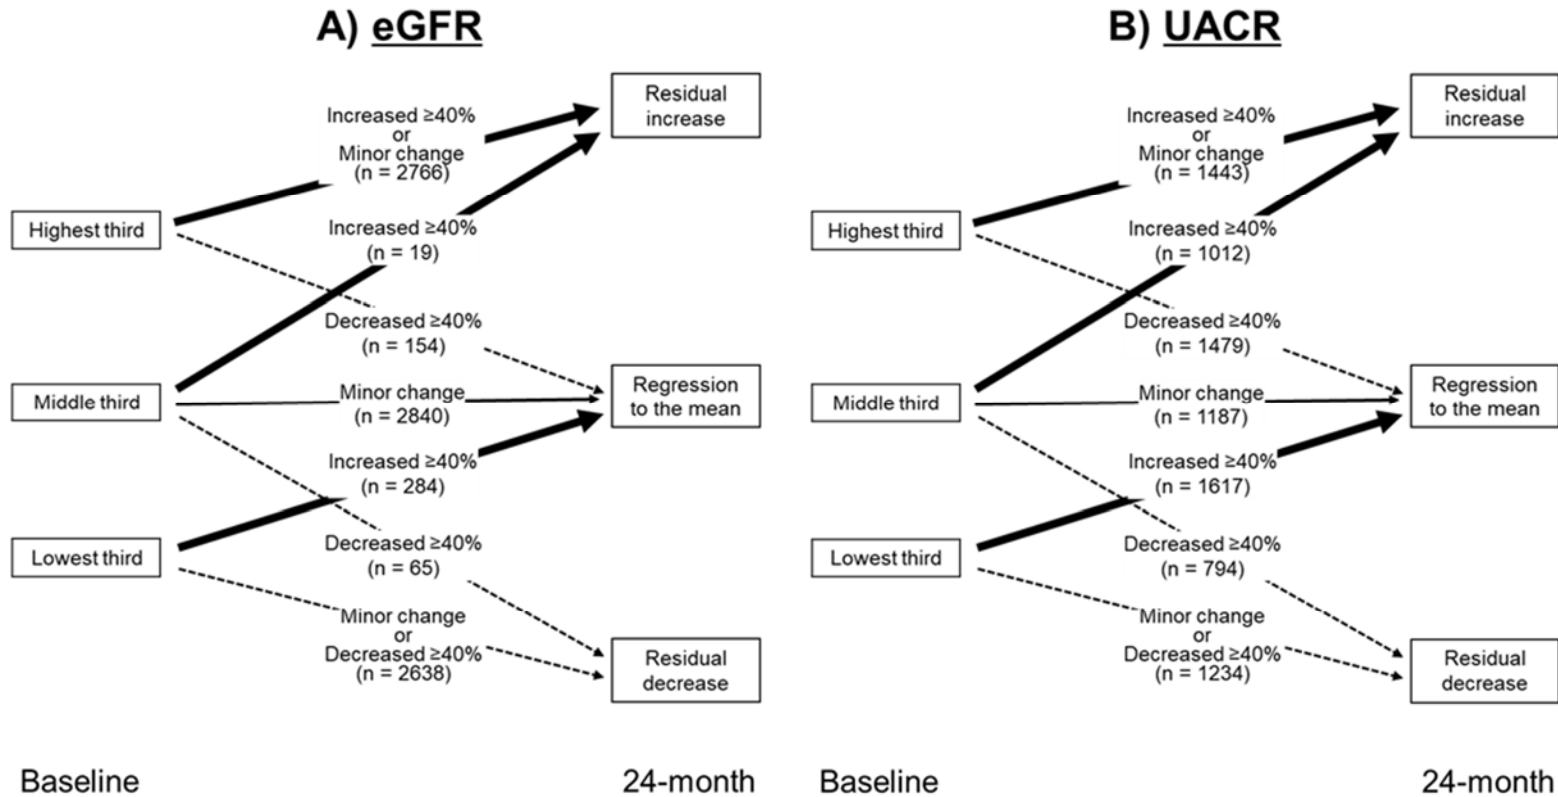

Supplemental Figure 4

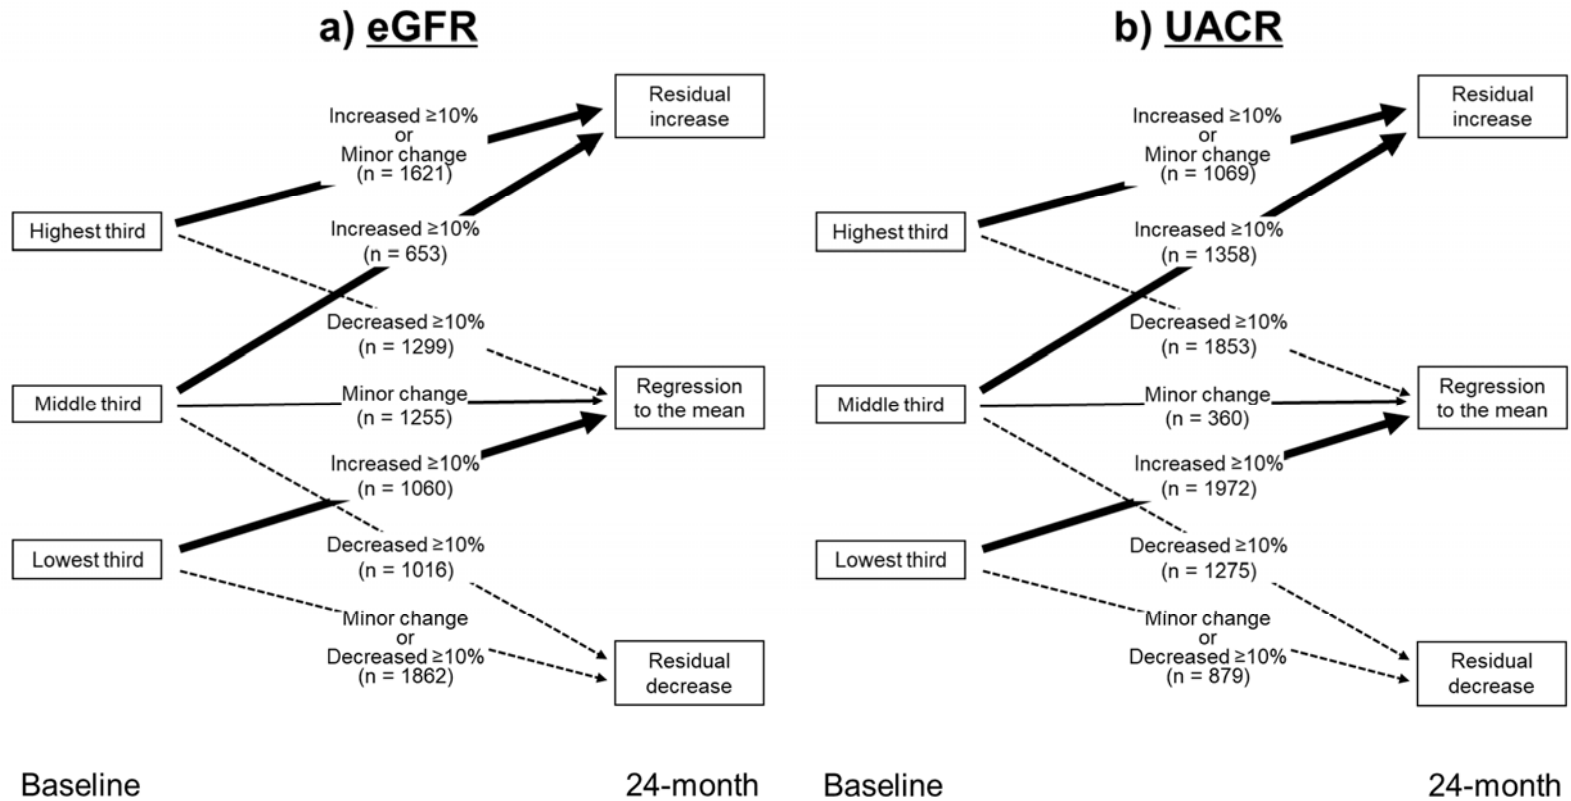

### Supplemental Figure 5

Combined major macrovascular, kidney events, and all-cause mortality

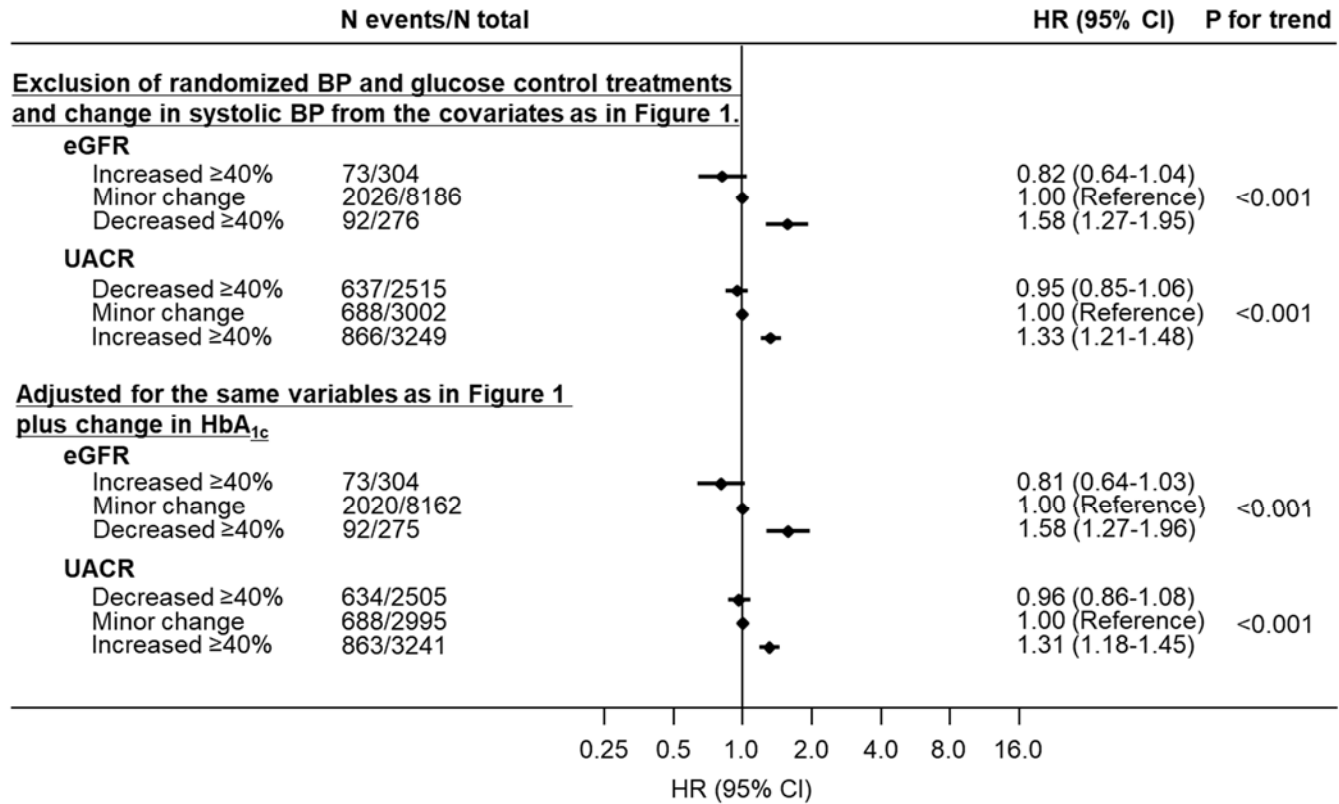

### Supplemental Figure 6

Combined major macrovascular, kidney events, and all-cause mortality

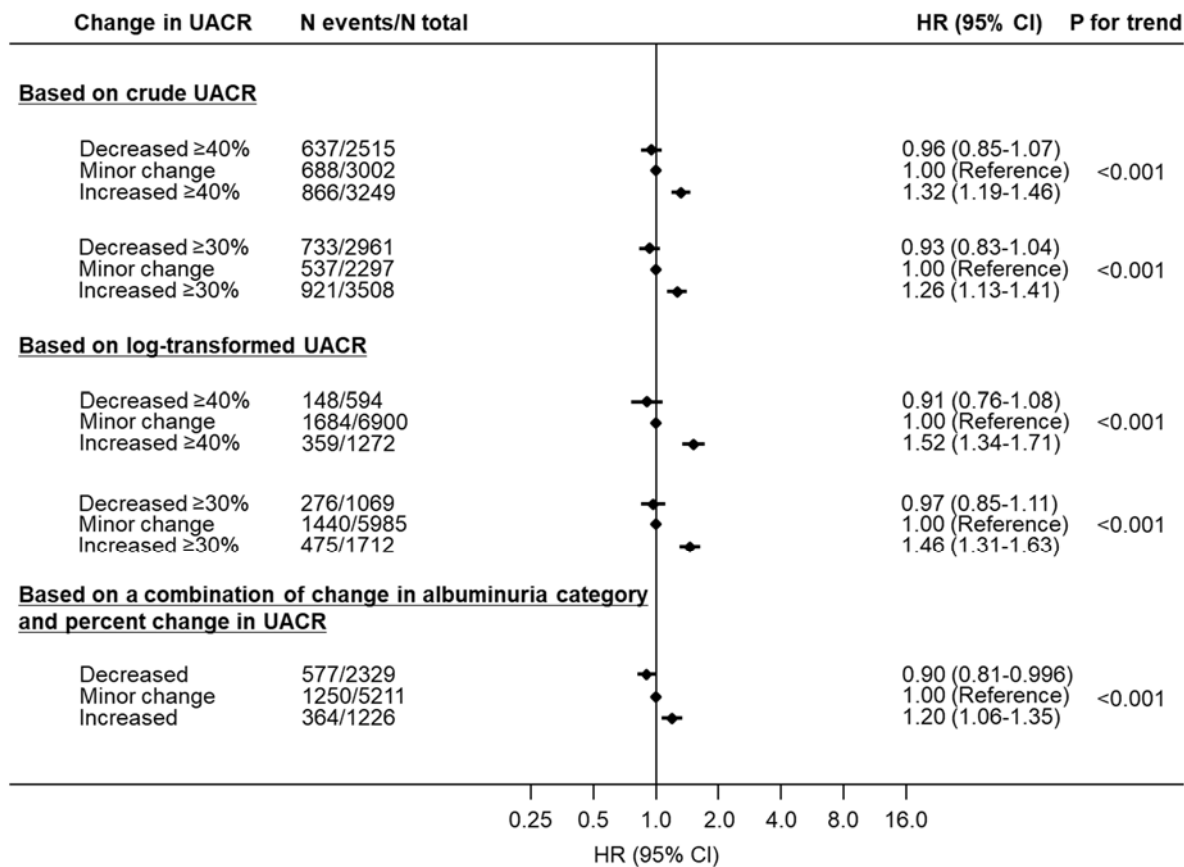



### Supplemental Figure 7

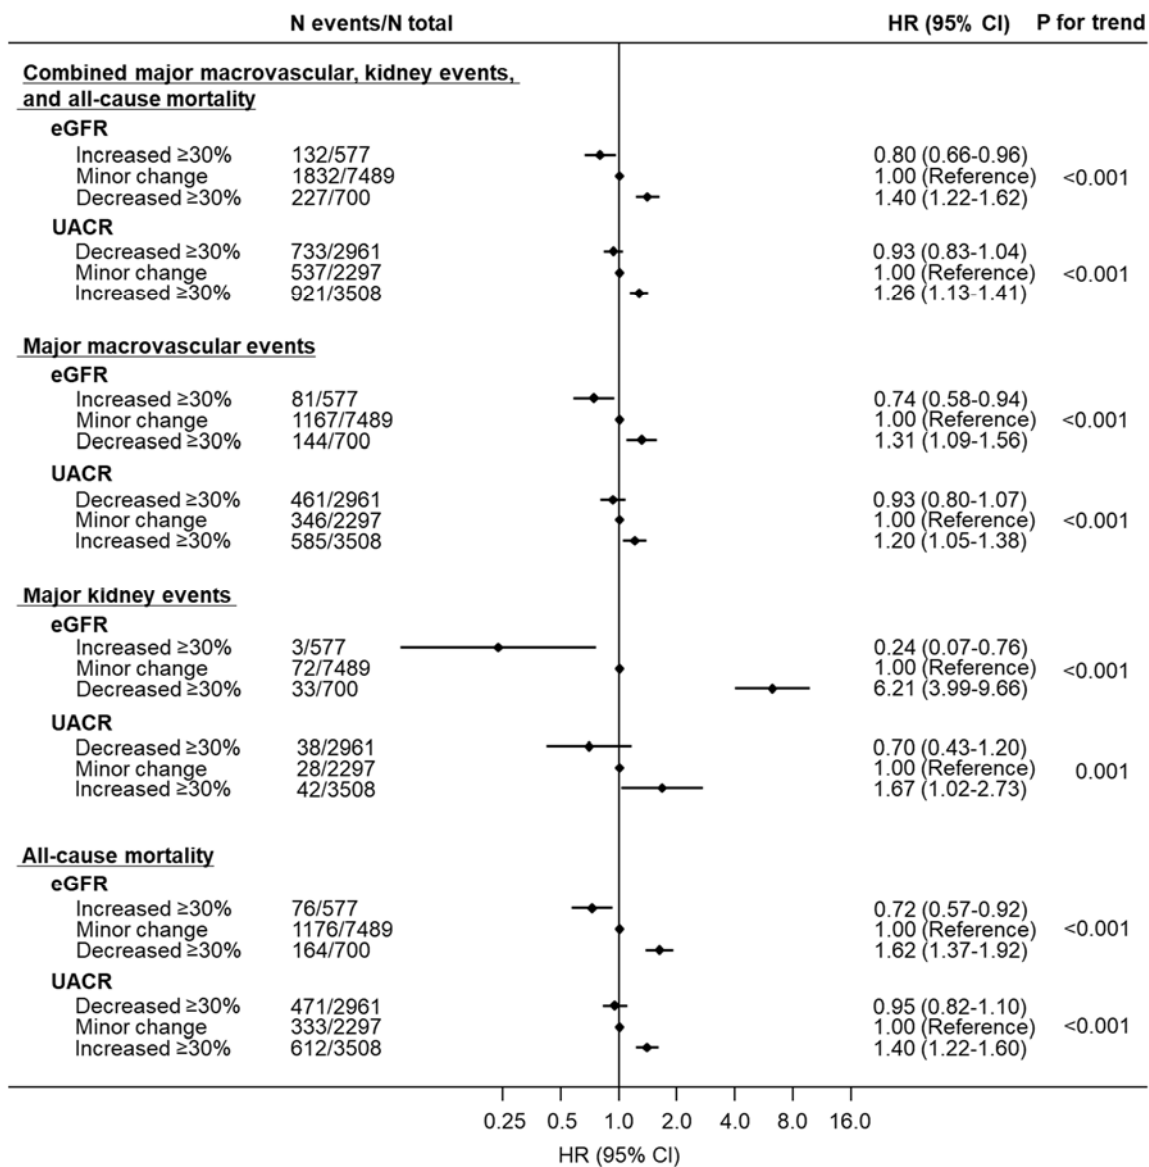

### Supplemental Figure 8

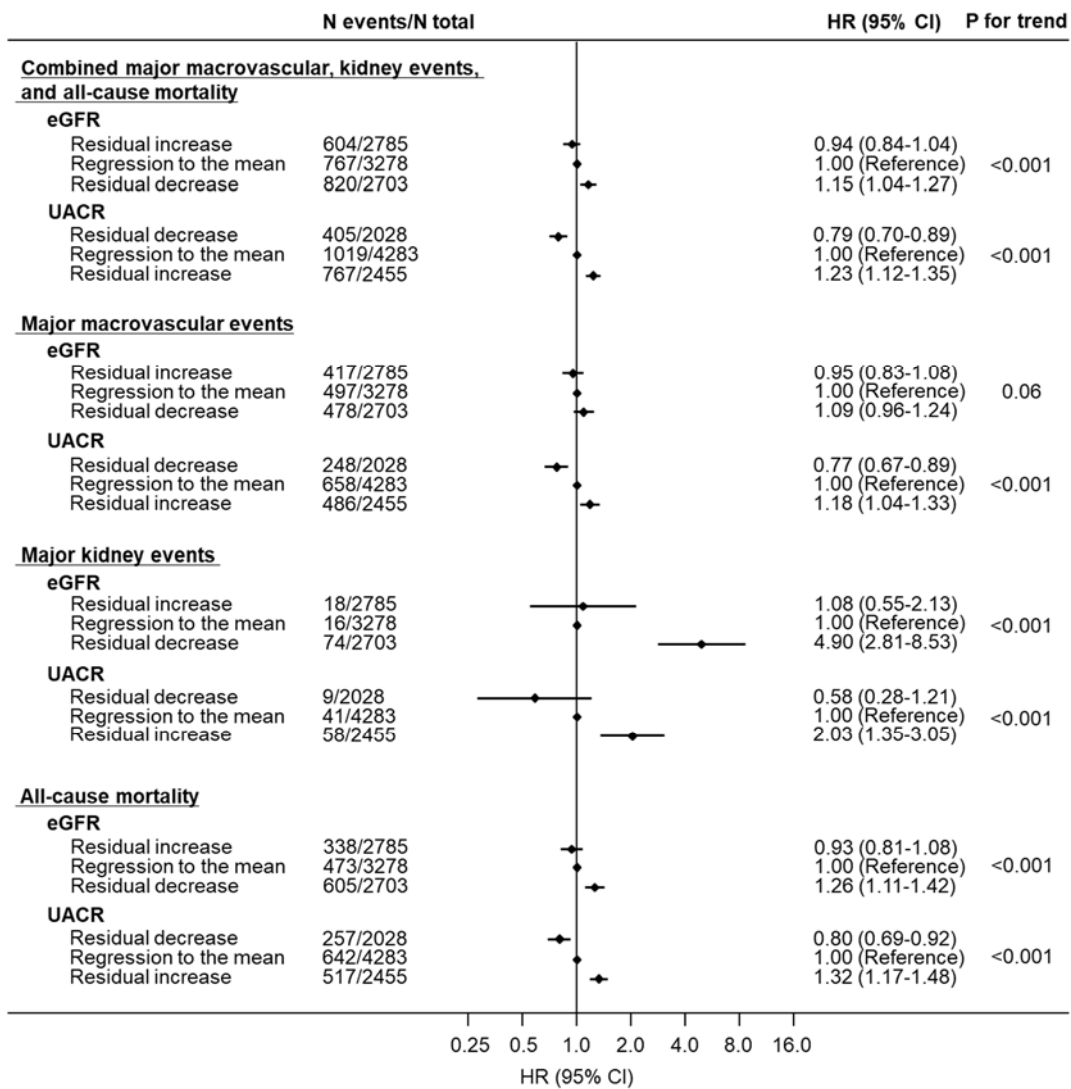

### Supplemental Figure 9

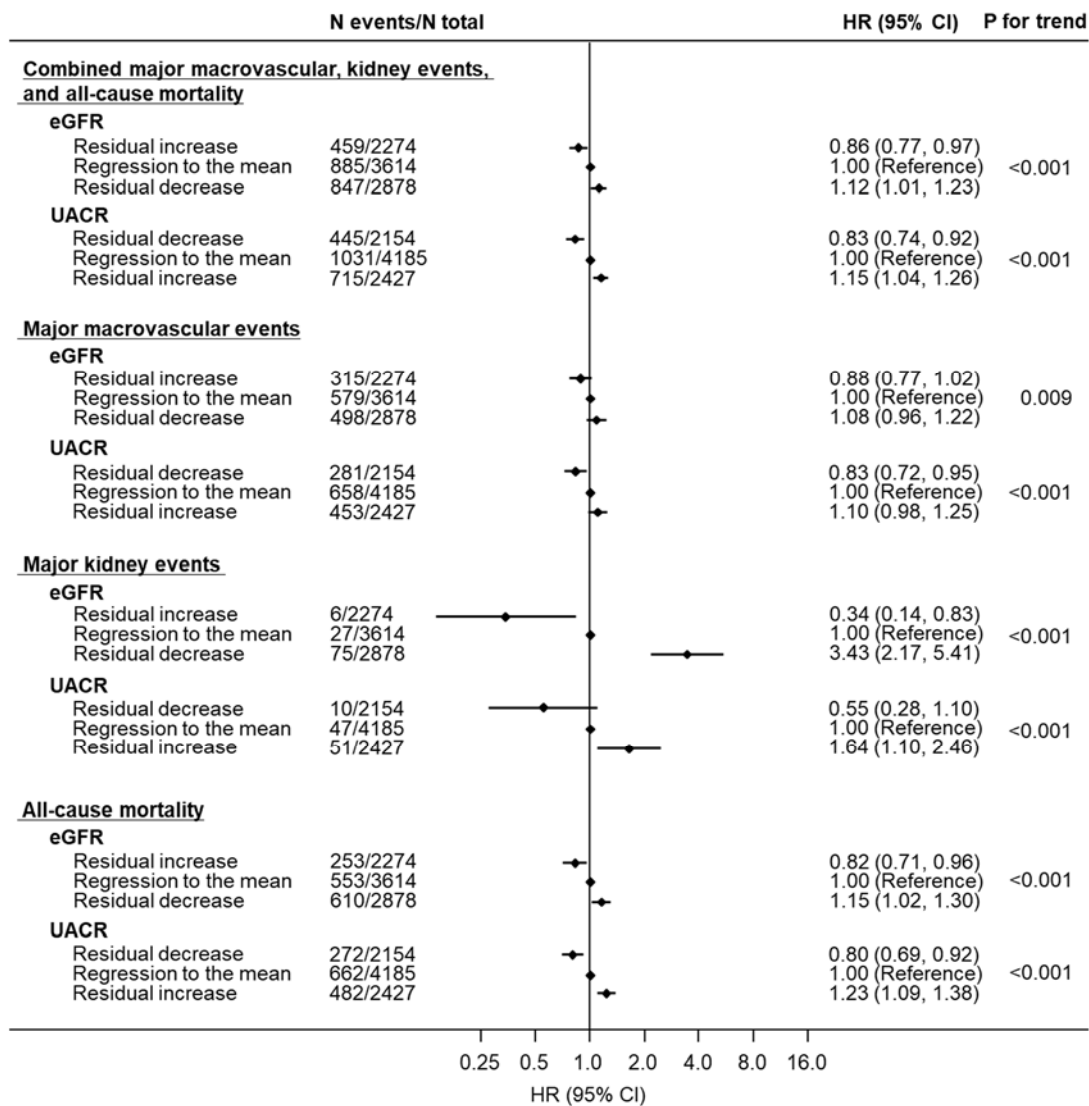

### Supplemental Figure 10

**Combined major macrovascular, kidney events, and all-cause mortality**

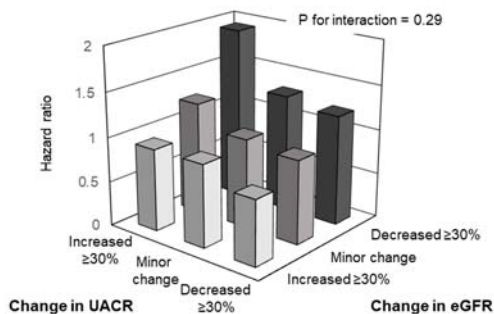

| Change in UACR        | Change in eGFR        |                      |                       |
|-----------------------|-----------------------|----------------------|-----------------------|
|                       | Increased $\geq 30\%$ | Minor change         | Decreased $\geq 30\%$ |
| Decreased $\geq 30\%$ | 0.73<br>(0.53, 1.00)  | 0.94<br>(0.83, 1.06) | 1.23<br>(0.96, 1.58)  |
| Minor change          | 0.93<br>(0.65, 1.32)  | (Reference)          | 1.31<br>(0.98, 1.76)  |
| Increased $\geq 30\%$ | 0.92<br>(0.69, 1.23)  | 1.25<br>(1.11, 1.41) | 1.93<br>(1.55, 2.41)  |

**Major macrovascular events**

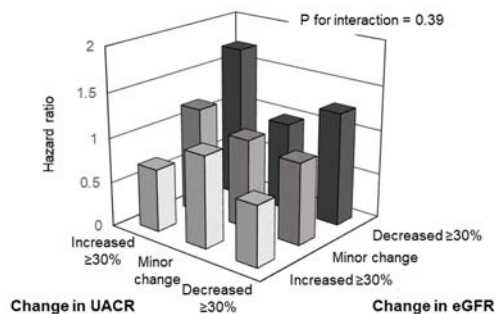

| Change in UACR        | Change in eGFR        |                      |                       |
|-----------------------|-----------------------|----------------------|-----------------------|
|                       | Increased $\geq 30\%$ | Minor change         | Decreased $\geq 30\%$ |
| Decreased $\geq 30\%$ | 0.68<br>(0.45, 1.01)  | 0.91<br>(0.78, 1.07) | 1.27<br>(0.93, 1.73)  |
| Minor change          | 1.03<br>(0.68, 1.55)  | (Reference)          | 0.99<br>(0.69, 1.48)  |
| Increased $\geq 30\%$ | 0.70<br>(0.48, 1.04)  | 1.20<br>(1.03, 1.38) | 1.72<br>(1.32, 2.26)  |

**Major kidney events**

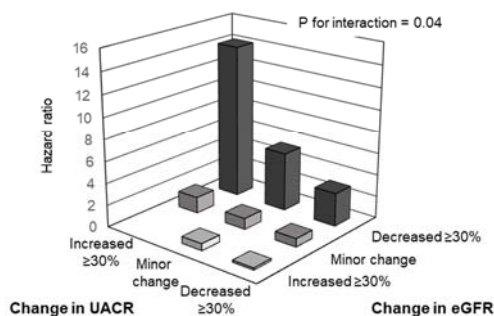

| Change in UACR        | Change in eGFR        |                      |                        |
|-----------------------|-----------------------|----------------------|------------------------|
|                       | Increased $\geq 30\%$ | Minor change         | Decreased $\geq 30\%$  |
| Decreased $\geq 30\%$ | 0.18<br>(0.02, 1.33)  | 0.76<br>(0.41, 1.39) | 3.02<br>(1.29, 7.07)   |
| Minor change          | 0.62<br>(0.14, 2.73)  | (Reference)          | 5.32<br>(2.24, 12.67)  |
| Increased $\geq 30\%$ | Not calculated        | 1.46<br>(0.79, 2.69) | 14.16<br>(7.07, 28.37) |

**All-cause mortality**

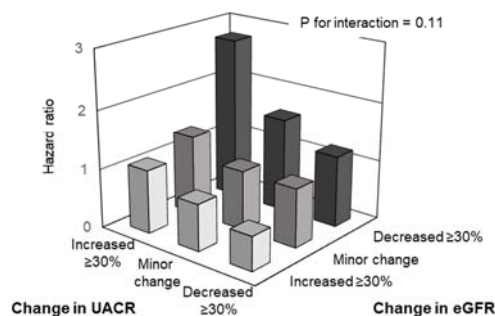

| Change in UACR        | Change in eGFR        |                      |                       |
|-----------------------|-----------------------|----------------------|-----------------------|
|                       | Increased $\geq 30\%$ | Minor change         | Decreased $\geq 30\%$ |
| Decreased $\geq 30\%$ | 0.57<br>(0.36, 0.90)  | 0.99<br>(0.84, 1.15) | 1.20<br>(0.88, 1.63)  |
| Minor change          | 0.79<br>(0.49, 1.27)  | (Reference)          | 1.60<br>(1.12, 2.27)  |
| Increased $\geq 30\%$ | 1.07<br>(0.75, 1.51)  | 1.34<br>(1.15, 1.55) | 2.76<br>(2.14, 3.56)  |

### Supplemental Figure 11

**Combined major macrovascular, kidney events, and all-cause mortality**

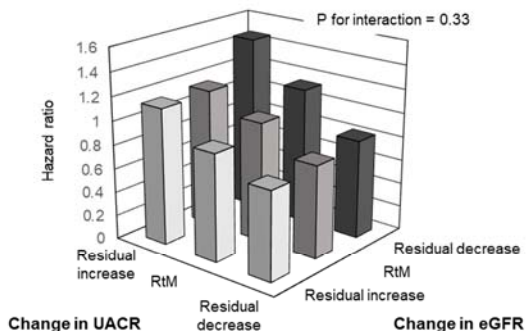

|                   | Change in eGFR       |                      |                      |
|-------------------|----------------------|----------------------|----------------------|
|                   | Residual increase    | RtM                  | Residual decrease    |
| Change in UACR    |                      |                      |                      |
| Residual decrease | 0.75<br>(0.61, 0.92) | 0.78<br>(0.65, 0.94) | 0.83<br>(0.67, 1.02) |
| RtM               | 0.90<br>(0.77, 1.05) | (Reference)          | 1.14<br>(0.99, 1.32) |
| Residual increase | 1.14<br>(0.96, 1.36) | 1.15<br>(0.98, 1.36) | 1.47<br>(1.26, 1.71) |

**Major macrovascular events**

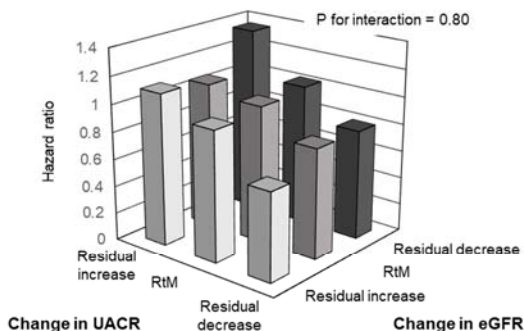

|                   | Change in eGFR       |                      |                      |
|-------------------|----------------------|----------------------|----------------------|
|                   | Residual increase    | RtM                  | Residual decrease    |
| Change in UACR    |                      |                      |                      |
| Residual decrease | 0.65<br>(0.50, 0.85) | 0.81<br>(0.64, 1.02) | 0.80<br>(0.62, 1.05) |
| RtM               | 0.96<br>(0.79, 1.15) | (Reference)          | 1.03<br>(0.85, 1.24) |
| Residual increase | 1.11<br>(0.90, 1.37) | 1.06<br>(0.87, 1.30) | 1.36<br>(1.12, 1.65) |

**Major kidney events**

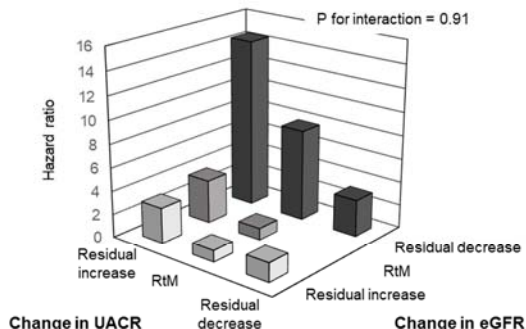

|                   | Change in eGFR       |                       |                        |
|-------------------|----------------------|-----------------------|------------------------|
|                   | Residual increase    | RtM                   | Residual decrease      |
| Change in UACR    |                      |                       |                        |
| Residual decrease | 1.62<br>(0.43, 6.08) | Not calculated        | 3.16<br>(0.91, 11.0)   |
| RtM               | 0.98<br>(0.28, 3.39) | (Reference)           | 7.82<br>(3.03, 20.2)   |
| Residual increase | 3.05<br>(1.01, 9.15) | 3.71<br>(1.29, 10.72) | 14.46<br>(5.64, 37.04) |

**All-cause mortality**

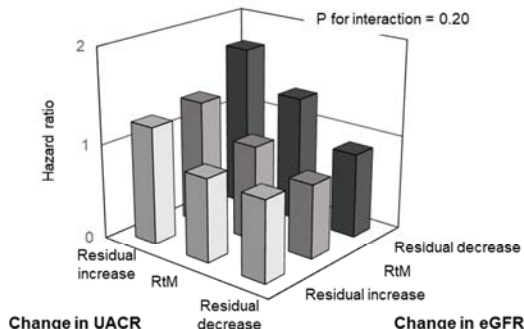

|                   | Change in eGFR       |                      |                      |
|-------------------|----------------------|----------------------|----------------------|
|                   | Residual increase    | RtM                  | Residual decrease    |
| Change in UACR    |                      |                      |                      |
| Residual decrease | 0.86<br>(0.66, 1.12) | 0.78<br>(0.61, 1.00) | 0.89<br>(0.69, 1.14) |
| RtM               | 0.88<br>(0.71, 1.09) | (Reference)          | 1.32<br>(1.10, 1.58) |
| Residual increase | 1.23<br>(0.98, 1.55) | 1.31<br>(1.07, 1.61) | 1.72<br>(1.43, 2.07) |
